# Supplementary material for: Separation and isotope ratio measurements of actinides and lanthanides in spent nuclear fuel samples by CE-MC-ICP-MS
Source: Royal Society of Chemistry journal article supplement (doi:10.1039/d2ja00265e), 2022-01-01
Supplement: d2ja00265e1.pdf [file d2ja00265e1.pdf]

## Supplementary material

### Separation and isotope ratio measurements of actinides and lanthanides in spent nuclear fuel samples by CE-MC-ICP-MS

Erwan Dupuis,<sup>\*a</sup> H  l  ne Isnard<sup>a</sup> and Fr  d  ric Chartier<sup>b</sup>

<sup>a</sup> Universit   Paris-Saclay, CEA, Service d'  tudes Analytiques et de R  activit   des Surfaces, 91191, Gif-sur-Yvette, France

E-mail: erwan.dupuis@cea.fr

<sup>b</sup> Universit   Paris-Saclay, CEA, D  partement de Physico-Chimie, 91191, Gif-sur-Yvette, France.

Table S1 - Cup configurations and subconfigurations used for MC-ICP-MS measurement of lanthanide fission products

| Configuration | Subconfiguration | L <sub>4</sub>     | L <sub>3</sub>     | L <sub>2</sub>     | L <sub>1</sub>     | C                  | H <sub>1</sub>     | H <sub>2</sub>     | H <sub>3</sub>     | H <sub>4</sub>     |
|---------------|------------------|--------------------|--------------------|--------------------|--------------------|--------------------|--------------------|--------------------|--------------------|--------------------|
| Lanthanides 1 | Nd               | 140                | 142                | 143                | 144                | 145                | 146                | 147                | 148                | 150                |
| Lanthanides 2 | Sm               | 147                | 148                | 149                | 150                | 151                | 152                | 153                | 154                | 156                |
|               | Eu-Gd            | 151                | 152                | 153                | 154                | 155                | 156                | 157                | 158                | 160                |
| Amplificator  |                  | 10 <sup>11</sup> Ω | 10 <sup>12</sup> Ω | 10 <sup>12</sup> Ω |

\*\*\*

Table S2 - Cup configurations and subconfigurations used for MC-ICP-MS measurement of actinides

| Configuration | Subconfiguration | L <sub>4</sub> | L <sub>3</sub>     | L <sub>2</sub>     | L <sub>1</sub>     | C                  | H <sub>1</sub>     | H <sub>2</sub>     | H <sub>3</sub>     | H <sub>4</sub> |
|---------------|------------------|----------------|--------------------|--------------------|--------------------|--------------------|--------------------|--------------------|--------------------|----------------|
| Actinides     | Am-Cm            |                | 241                | 242                | 243                | 244                | 245                | 246                | 247                |                |
|               | Pu               |                | 236                | 237                | 238                | 239                | 240                | 241                | 242                |                |
|               | U                |                | 233                | 234                | 235                | 236                | 237                | 238                | 239                |                |
| Amplificator  |                  |                | 10 <sup>11</sup> Ω | 10 <sup>12</sup> Ω | 10 <sup>11</sup> Ω |                |

\*\*\*

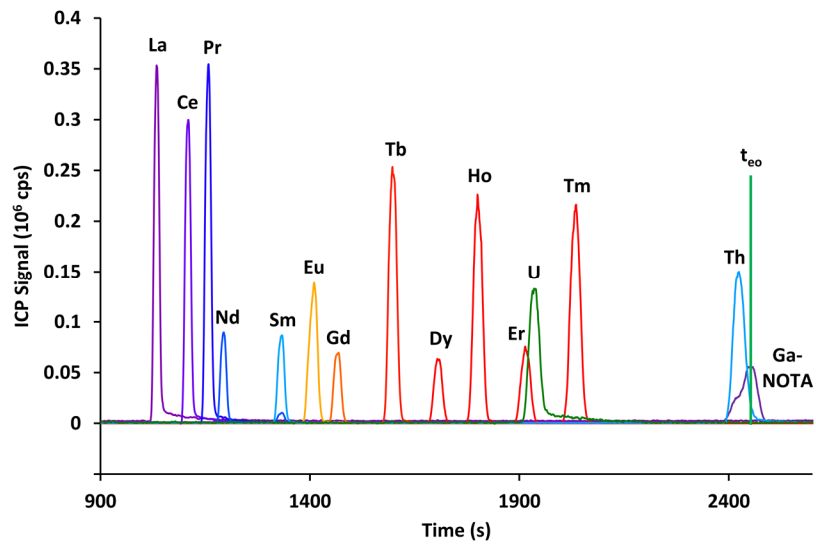

Figure S1 - Electrophoregram obtained by CE-Q-ICP-MS for the mixture containing 14 lanthanides, uranium and thorium with a 100 mmol.L<sup>-1</sup>  $\alpha$ -HIBA electrolyte.  $t_{eo}$  is the time where neutrals migrate, as calculated at the apex of the Ga-NOTA peak. Yb and Lu were omitted from the figure for visibility reasons.

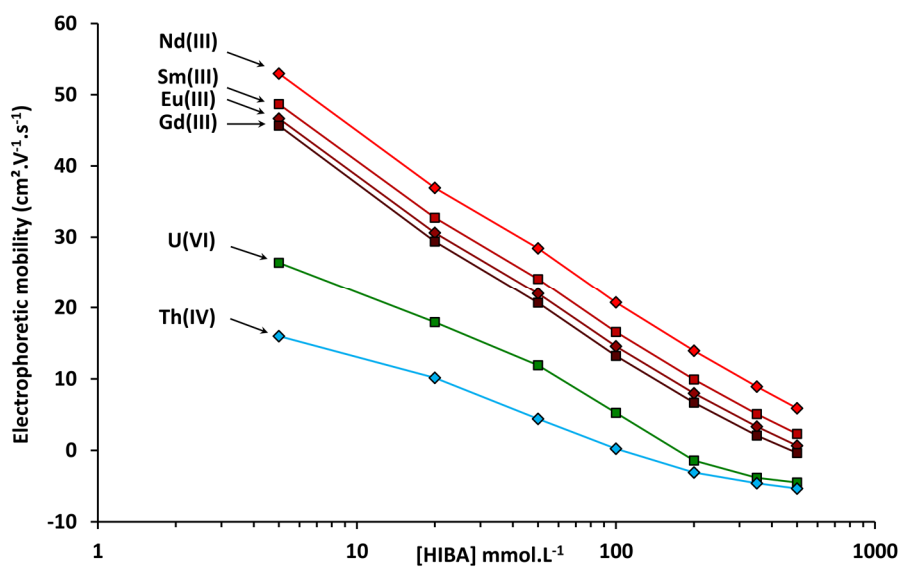

Figure S2 - Electrophoretic mobilities ( $\times 10^{-5}$  cm<sup>2</sup>.V<sup>-1</sup>.s<sup>-1</sup>) measured by CE-Q-ICP-MS of Nd, Sm, Eu, Gd, Th, and U as a function of the  $\alpha$ -HIBA concentration at a pH of 3.
